# Supplementary material for: Protocol for a cluster randomised stepped wedge trial assessing the impact of a community-level hygiene intervention and a water intervention using riverbank filtration technology on diarrhoeal prevalence in India
Source: PubMed Central journal article supplement — BMJ Open. 2017 Mar 17;7(3):e015036. doi: 10.1136/bmjopen-2016-015036 (PMC5372111; doi:10.1136/bmjopen-2016-015036), 2017-03-17
Supplement: bmjopen-2016-015036supp_appendixA.pdf [file bmjopen-2016-015036supp_appendixA.pdf]

## Appendix A: World Health Organization Trial Registration Data Set

| DATA CATEGORY                                 | INFORMATION                                                                                                                                                                                                                                                                   |
|-----------------------------------------------|-------------------------------------------------------------------------------------------------------------------------------------------------------------------------------------------------------------------------------------------------------------------------------|
| Primary registry and trial identifying number | Australian New Zealand Clinical Trials Registry<br>ACTRN12616001286437                                                                                                                                                                                                        |
| Date of registration in primary registry      | 13/09/2016                                                                                                                                                                                                                                                                    |
| Secondary identifying numbers                 | U1111-1187-3423 (Universal Trial Number)<br>NHMRC1083408 (Grant number from National Health and Medical Research Council Australia)                                                                                                                                           |
| Source(s) of monetary or material support     | National Health and Medical Research Council                                                                                                                                                                                                                                  |
| Primary sponsor                               | Professor Karin Leder<br>Monash University, Australia<br>School of Public Health and Preventive Medicine,<br>Monash University<br>Level 6 The Alfred Centre<br>99 Commercial Road,<br>Melbourne VIC 3004 Australia<br>Phone: +61 3 9903 0577<br>Email: karin.leder@monash.edu |
| Secondary sponsor(s)                          | Professor Tom Boving<br>University of Rhode Island, U.S.A.                                                                                                                                                                                                                    |
| Contact for public queries                    | Dr Sarah McGuinness<br>School of Public Health and Preventive Medicine,<br>Monash University<br>Level 6 The Alfred Centre<br>99 Commercial Road,<br>Melbourne VIC 3004 Australia<br>Phone: +61 3 9903 0118<br>Email: sarah.mcguinness@monash.edu                              |
| Contact for scientific queries                | Dr Sarah McGuinness<br>School of Public Health and Preventive Medicine,<br>Monash University<br>Level 6 The Alfred Centre<br>99 Commercial Road,<br>Melbourne VIC 3004 Australia<br>Phone: +61 3 9903 0118<br>Email: sarah.mcguinness@monash.edu                              |
| Public title                                  | Evaluating the impact of hygiene and water interventions on diarrhoeal disease in India                                                                                                                                                                                       |
| Scientific title                              | A cluster randomised stepped-wedge trial assessing the impact of a community-level hygiene intervention and a water intervention using riverbank filtration technology on diarrhoeal prevalence in India                                                                      |
| Countries of recruitment                      | India                                                                                                                                                                                                                                                                         |

|                                             |                                                                                                                                                                                                                                                                                                                                                                                                                                                                                                                                                                                                                                                                                                                |
|---------------------------------------------|----------------------------------------------------------------------------------------------------------------------------------------------------------------------------------------------------------------------------------------------------------------------------------------------------------------------------------------------------------------------------------------------------------------------------------------------------------------------------------------------------------------------------------------------------------------------------------------------------------------------------------------------------------------------------------------------------------------|
| Health conditions(s) or problems(s) studied | Diarrhoea<br>Respiratory infections<br>Skin infections                                                                                                                                                                                                                                                                                                                                                                                                                                                                                                                                                                                                                                                         |
| Intervention(s)                             | Intervention: delivery of a community-level hygiene education program and delivery of riverbank filtration (RBF) treated water at a community level (improved water quality)<br>Control: delivery of a community-level hygiene education program and improved access to untreated river water at a community level (improved water quantity)                                                                                                                                                                                                                                                                                                                                                                   |
| Key inclusion and exclusion criteria        | Ages eligible for study: all<br>Sexes eligible for study: both<br>Village inclusion criteria: rural villages in India currently using untreated river water as a primary source of drinking water, hydro-geologic conditions allowing construction of RBF systems, availability of suitable land for RBF system installation and community receptiveness to installation of RBF systems and commitment to ongoing operation and maintenance<br>Village exclusion criteria: villages with less than 500 households, where untreated river water is not a primary source of drinking water for most households, and/or where hydro-geologic conditions are unsuitable or land not available for RBF installation |
| Study type                                  | Type of study: Interventional<br>Randomisation performed by statistician with order determined from computer generated uniform random numbers. Allocation sequence known to statistician and one other investigator. Other investigators and participants blinded to allocation sequence.<br>Primary purpose: prevention                                                                                                                                                                                                                                                                                                                                                                                       |
| Date of first enrolment                     | 25/02/2016                                                                                                                                                                                                                                                                                                                                                                                                                                                                                                                                                                                                                                                                                                     |
| Target sample size                          | 1720 households                                                                                                                                                                                                                                                                                                                                                                                                                                                                                                                                                                                                                                                                                                |
| Recruitment status                          | Recruiting                                                                                                                                                                                                                                                                                                                                                                                                                                                                                                                                                                                                                                                                                                     |
| Primary outcome(s)                          | Self-reported diarrhoea (7 day period prevalence)                                                                                                                                                                                                                                                                                                                                                                                                                                                                                                                                                                                                                                                              |
| Key secondary outcomes                      | Self-reported respiratory infections (7 day period prevalence)<br>Self-reported skin infections (7 day period prevalence)<br>Self-reported hygiene practices<br>Self-reported preferred/adopted domestic water supply and household water consumption                                                                                                                                                                                                                                                                                                                                                                                                                                                          |
