# Supplementary material for: Protocol for a cluster randomised stepped wedge trial assessing the impact of a community-level hygiene intervention and a water intervention using riverbank filtration technology on diarrhoeal prevalence in India
Source: PubMed Central journal article supplement — BMJ Open. 2017 Mar 17;7(3):e015036. doi: 10.1136/bmjopen-2016-015036 (PMC5372111; doi:10.1136/bmjopen-2016-015036), 2017-03-17

Supplemental Figure 1: Handwashing poster

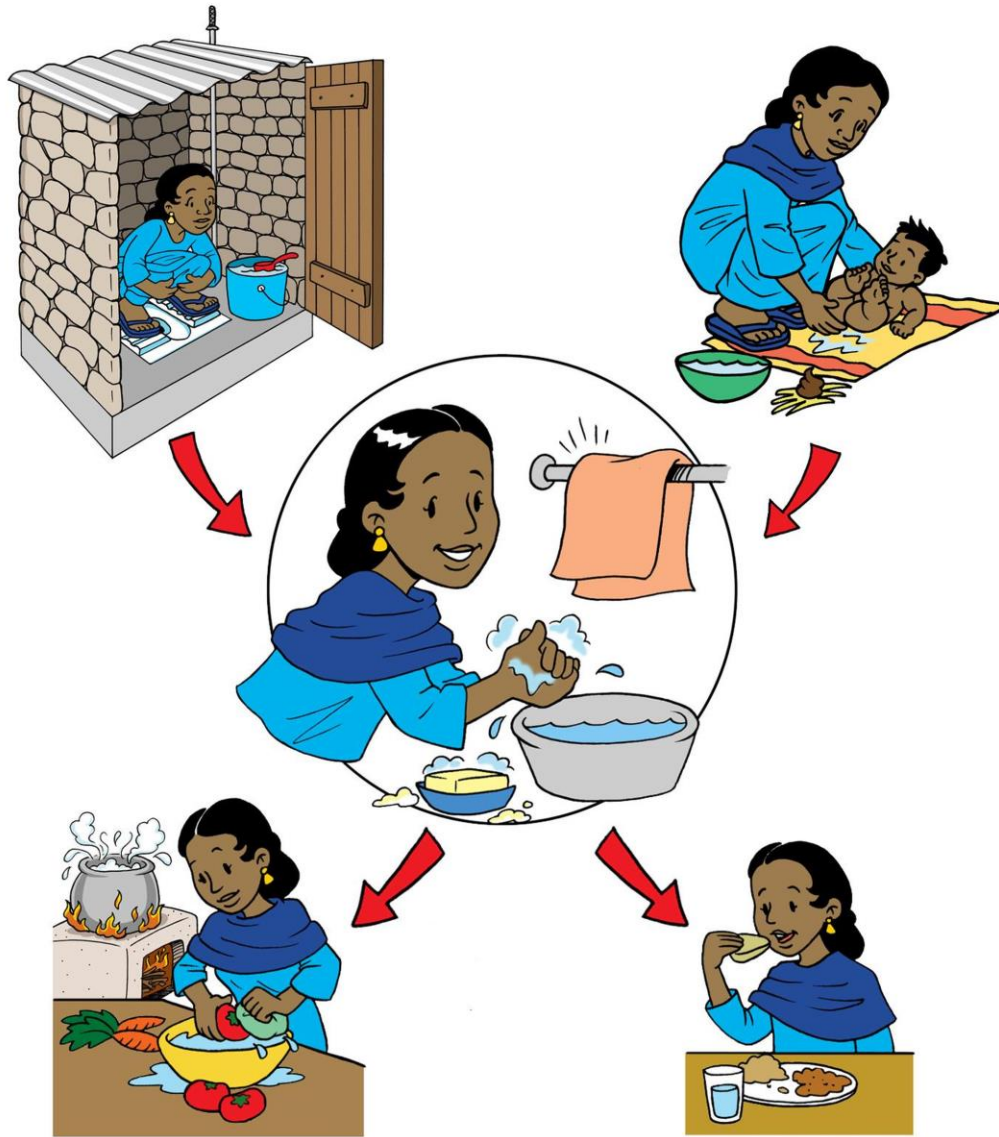

Wash your hands to avoid disease

This material has been sourced from Water, Hygiene and Sanitation Presentation Material and modified. It is licenced under the Creative Commons Attribution 2.5 Canada Licence. It is attributed to The Centre for Affordable Water and Sanitation Technology (CAWST) and HydrAID. The original version can be found at [http://resources.cawst.org/system/files/Posters\\_South%20Asia\\_HydrAid\\_All%20With%20Text\\_High\\_2009-03\\_en.pdf](http://resources.cawst.org/system/files/Posters_South%20Asia_HydrAid_All%20With%20Text_High_2009-03_en.pdf)

## Supplemental Figure 2: Water storage poster

Keep your drinking water container covered

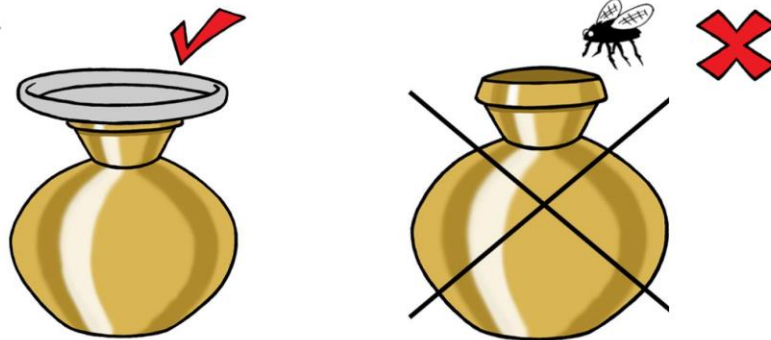

Pour drinking water directly into a cup or glass

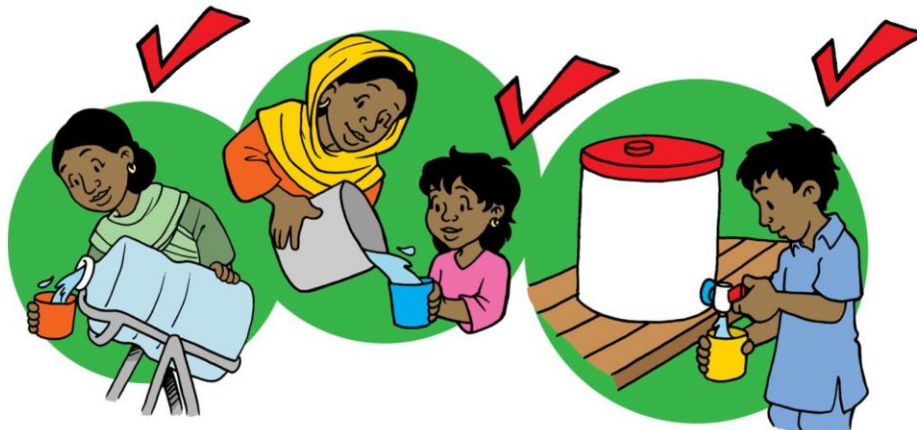

If you cannot pour from the container only use a clean dipper with a long handle

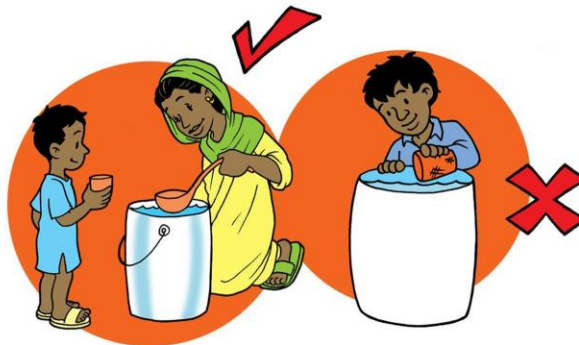

Supplement: bmjopen-2016-015036supp_figures.pdf [file bmjopen-2016-015036supp_figures.pdf]
